# Supplementary material for: NYU-EDA in Modelling the Effect of COVID-19 on Patient Volumes in A Finnish Emergency Department
Source: Research Square preprint supplement (doi:10.21203/rs.3.rs-102314/v1), 2020-11-09
Supplement: Supplementary file 1 [file 330c53d9f30fb43460035b9a.xlsx]

## Sheet: Sheet1
		Study year, Arr±Std
		2018		2019		2020		Δ2020	(%)		p
	Emergent EDCN ~P/A	16.3696	3.50595	17.6627	4.05213	13.7206	4.0843	-3.29554	-19.3671	2.91582e-09	<.001
	Emergent EDCN P/A	7.00979	2.27784	8.39452	2.95583	5.56131	2.52531	-2.14084	-27.7954	9.39579e-10	<.001
	Emergent PCT	16.7454	3.64597	20.0453	4.80555	14.8722	4.64236	-3.52314	-19.1524	1.25671e-09	<.001
	Non-Emergent	16.6325	3.75351	19.1586	5.11706	10.3347	3.3826	-7.56084	-42.2498	1.21649e-25	<.001
	Alcohol	1.60944	1.34056	1.89769	1.57961	2.16193	1.62567	0.408364	23.2877	0.0908615	.09
	Drug	0.084075	0.287635	0.120107	0.337363	0.0720643	0.267937	-0.0300268	-29.4118	0.0143395	.01
	Injury	27.2043	7.73127	27.4445	6.65475	20.6104	6.84977	-6.71399	-24.5714	6.88777e-12	<.001
	Psych	1.74583	1.36872	2.19307	1.47013	1.91113	1.48413	-0.0583232	-2.96139	0.20094	.2
	Unclassified	19.5785	4.93285	22.0616	5.32369	17.7733	5.89835	-3.04682	-14.6341	1.52391e-06	<.001
	Total	106.979	11.3886	118.978	13.7835	87.0176	12.2829	-25.9612	-22.9788	3.46052e-26	<.001
